# Supplementary material for: Impacts of Litter Composition on the Structure and Functional Pathways of Soil Microbial Community during Phyllostachys Edulis Expansion
Source: MDPI journal article supplement (doi:10.3390/agronomy12010220), 2022-01-17
Supplement: s1 [file s1]

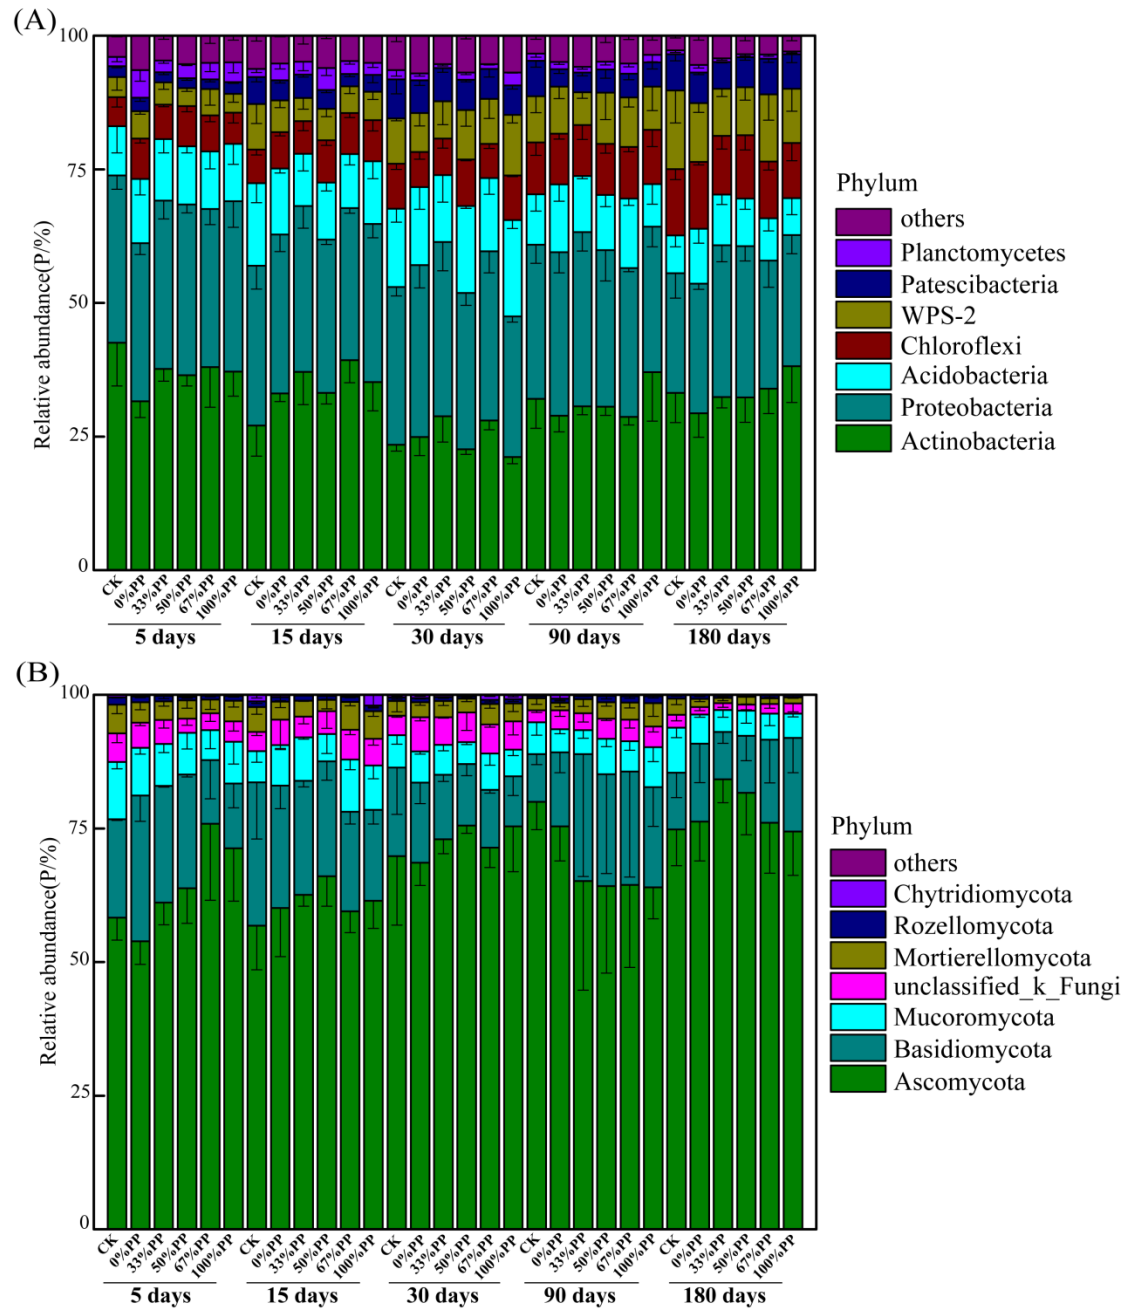

Fig. S1 The community composition of bacteria (A) and fungal (B) at the level of phylum in the broadleaved forest soil during the incubation. CK, with no litter; 0% PP, bamboo litter occupying at 0%; 33% PP, bamboo litter occupying at 33%; 50% PP, bamboo litter occupying at 50%; 67% PP, bamboo litter occupying at 67%; 100% PP, bamboo litter occupying at 100%. Error bars indicated standard deviation.

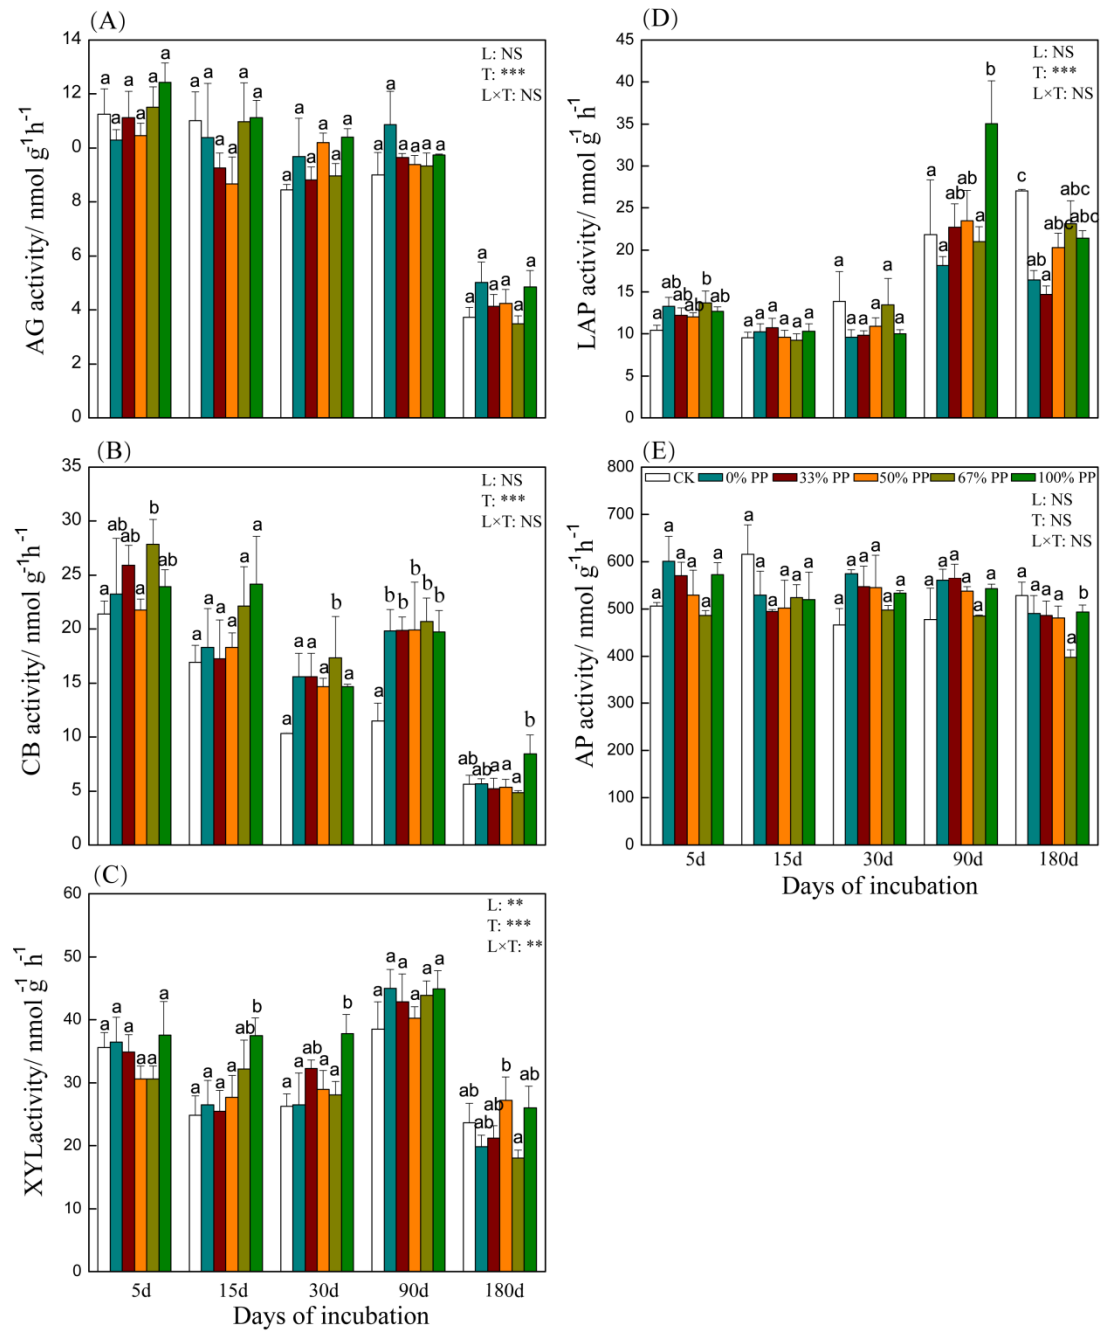

Fig. S2 The activities of  $\alpha$ -1,4-glucosidase (AG, A),  $\beta$ -D-cellobiosidase (CB, B),  $\beta$ -1,4-xylosidase (XYL, C), Leucine aminopeptidase (LAP, D) and Acid phosphomonoesterase (AP, E) under additions of bamboo proportion at 0% (0% PP), 33% (33% PP), 50% (50% PP), 67% (67% PP), and 100% (100% PP) at different period. The symbol \* indicates significant differences of mean values ( $P < 0.05$ ) among treatments at each measurement time. Bars with different letters are significantly different ( $P < 0.05$ ).

Table S1 Treatment effects on soil chemical properties during the incubation

| Treatment | 5 days of incubation |         |        |                                 |                                 |          |         | 10 days of incubation |           |        |                                 |                                 |         |        | 30 days of incubation |          |        |                                 |
|-----------|----------------------|---------|--------|---------------------------------|---------------------------------|----------|---------|-----------------------|-----------|--------|---------------------------------|---------------------------------|---------|--------|-----------------------|----------|--------|---------------------------------|
|           | pH                   | SOC     | TN     | NO <sub>3</sub> <sup>-</sup> -N | NH <sub>4</sub> <sup>+</sup> -N | DOC      | DN      | pH                    | SOC       | TN     | NO <sub>3</sub> <sup>-</sup> -N | NH <sub>4</sub> <sup>+</sup> -N | DOC     | DN     | pH                    | SOC      | TN     | NO <sub>3</sub> <sup>-</sup> -N |
| CK        | 4.037a               | 26.387a | 1.391a | 8.84b                           | 30.64bc                         | 643.60b  | 57.52b  | 4.137a                | 26.348a   | 1.387a | 21.71c                          | 18.96b                          | 676.44b | 59.22c | 3.930a                | 25.846ab | 1.430a | 37.45de                         |
| 0% PP     | 4.200b               | 26.279a | 1.430a | 6.41a                           | 22.80a                          | 604.96ab | 51.02a  | 4.253b                | 26.445ab  | 1.431a | 14.98a                          | 13.64a                          | 712.96c | 47.51a | 4.193d                | 25.744ab | 1.480a | 24.57a                          |
| 33% PP    | 4.160b               | 26.435a | 1.416a | 7.15a                           | 28.64b                          | 593.20a  | 53.68ab | 4.257b                | 27.053bc  | 1.429a | 18.33b                          | 16.69b                          | 679.76b | 54.34b | 4.143cd               | 25.528a  | 1.470a | 28.53b                          |
| 50% PP    | 4.177b               | 26.734a | 1.421a | 7.45a                           | 33.33bc                         | 583.84a  | 55.01ab | 4.243b                | 27.327c   | 1.407a | 17.96b                          | 18.70b                          | 675.64b | 52.69b | 4.090bc               | 25.849ab | 1.470a | 31.15bc                         |
| 67% PP    | 4.143b               | 26.804a | 1.413a | 7.15a                           | 35.66c                          | 566.80a  | 54.87ab | 4.220b                | 26.768abc | 1.409a | 18.43b                          | 18.99b                          | 639.49a | 54.44b | 4.11bc                | 26.511bc | 1.469a | 34.26cd                         |
| 100% PP   | 4.180b               | 26.221a | 1.398a | 7.33a                           | 32.94bc                         | 558.24a  | 56.61ab | 4.257b                | 27.238c   | 1.403a | 18.90b                          | 22.62c                          | 626.72a | 55.46b | 4.053b                | 26.770c  | 1.460a | 40.16e                          |

| Treatment | 30 days of incubation           |          |        | 90 days of incubation |          |        |                                 |                                 |         | 180 days of incubation |         |          |        |                                 |                                 |          |         |
|-----------|---------------------------------|----------|--------|-----------------------|----------|--------|---------------------------------|---------------------------------|---------|------------------------|---------|----------|--------|---------------------------------|---------------------------------|----------|---------|
|           | NH <sub>4</sub> <sup>+</sup> -N | DOC      | DN     | pH                    | SOC      | TN     | NO <sub>3</sub> <sup>-</sup> -N | NH <sub>4</sub> <sup>+</sup> -N | DOC     | DN                     | pH      | SOC      | TN     | NO <sub>3</sub> <sup>-</sup> -N | NH <sub>4</sub> <sup>+</sup> -N | DOC      | DN      |
| CK        | 12.40a                          | 679.08c  | 73.26b | 3.813a                | 23.199ab | 1.491a | 56.67cd                         | 11.71bc                         | 685.19a | 96.96b                 | 3.84a   | 25.519c  | 1.377a | 48.37a                          | 16.64c                          | 437.36a  | 192.22a |
| 0% PP     | 11.89a                          | 677.04c  | 58.61a | 4.013c                | 22.196a  | 1.578a | 45.6a                           | 8.97a                           | 775.57a | 80.25a                 | 3.9bc   | 24.310a  | 1.407b | 58.29b                          | 7.55a                           | 549.74b  | 181.62a |
| 33% PP    | 12.26a                          | 653.04a  | 60.74a | 3.970bc               | 22.644ab | 1.558a | 51.43b                          | 10.10ab                         | 715.90a | 83.74ab                | 3.897bc | 24.459ab | 1.361a | 56.69b                          | 11.35b                          | 505.96ab | 183.48a |
| 50% PP    | 11.57a                          | 664.16b  | 61.69a | 3.937bc               | 23.166ab | 1.546a | 53.50bc                         | 9.54a                           | 690.69a | 81.1a                  | 3.887bc | 24.497ab | 1.363a | 55.57b                          | 12.27b                          | 473.88ab | 184.8a  |
| 67% PP    | 12.17a                          | 659.84ab | 72.11b | 3.933bc               | 23.763b  | 1.520a | 54.05bc                         | 10.56abc                        | 703.87a | 84.83ab                | 3.870b  | 24.138a  | 1.354a | 54.99b                          | 13.41b                          | 467.55ab | 175.2a  |
| 100% PP   | 13.38a                          | 674.72c  | 78.17b | 3.903b                | 23.625b  | 1.501a | 59.33d                          | 12.14c                          | 754.55a | 94.96ab                | 3.860c  | 24.846b  | 1.357a | 54.43ab                         | 19.81d                          | 455.13ab | 224.46b |

Note: SOC, g kg<sup>-1</sup>; TN, g kg<sup>-1</sup>; NO<sub>3</sub><sup>-</sup>-N, mg kg<sup>-1</sup>; NH<sub>4</sub><sup>+</sup>-N, mg kg<sup>-1</sup>; DOC, mg kg<sup>-1</sup>; DN, mg kg<sup>-1</sup>. CK, with no litter; 0% PP, bamboo litter occupying at 0%; 33% PP, bamboo litter occupying at 33%; 50% PP, bamboo litter occupying at 50%; 67% PP, bamboo litter occupying at 67%; 100% PP, bamboo litter occupying at 100%.

Different letters in a single row indicate significant different means according to Duncan's test at  $P < 0.05$  level.
